# Supplementary material
Source: PubMed Central journal article supplement (PMC6092962)
Supplement: NIHMS931784-supplement-2.pdf [file NIHMS931784-supplement-2.pdf]

|                      | <b>Viewed<br/>M8<br/>(chair)</b> | <b>Viewed<br/>M7</b> | <b>Viewed<br/>M6</b> | <b>Viewed<br/>M5</b> | <b>Viewer<br/>MR<br/>(chair)</b> | <b>Viewed<br/>M4</b> | <b>Viewer<br/>MF<br/>(chair)</b> | <b>Viewed<br/>M3</b> | <b>Viewed<br/>M2<br/>(chair)</b> | <b>Viewed<br/>M1<br/>(chair)</b> |
|----------------------|----------------------------------|----------------------|----------------------|----------------------|----------------------------------|----------------------|----------------------------------|----------------------|----------------------------------|----------------------------------|
| Viewed<br>M1         | 9                                | 3                    | 5                    | 4                    | 12                               | 5                    | 11                               | 3                    | 9                                |                                  |
| Viewed<br>M2         | 8                                | 4                    | 4                    | 8                    | 13                               | 4                    | 10                               | X                    |                                  | 2                                |
| Viewed<br>M3         | 1                                | 2                    | 0                    | X                    | 10                               | 7                    | 2                                |                      | X                                | 0                                |
| <b>Viewer<br/>MF</b> | 3                                | 4                    | X                    | 20                   | 7                                | 4                    |                                  | 1                    | 2                                | 4                                |
| Viewed<br>M4         | 4                                | 5                    | 4                    | 2                    | 2                                |                      | 5                                | 4                    | 0                                | 1                                |
| <b>Viewer<br/>MR</b> | 12                               | 10                   | 9                    | X                    |                                  | 0                    | 5                                | 2                    | 3                                | 1                                |
| Viewed<br>M5         | 1                                | 5                    | X                    |                      | X                                | 1                    | 3                                | X                    | 0                                | 0                                |
| Viewed<br>M6         | 4                                | 6                    |                      | X                    | 2                                | 2                    | X                                | 2                    | 1                                | 0                                |
| Viewed<br>M7         | 1                                |                      | 2                    | 2                    | 2                                | 1                    | 1                                | 0                    | 0                                | 0                                |
| Viewed<br>M8         |                                  | 1                    | 3                    | 1                    | 4                                | 1                    | 1                                | 1                    | 0                                | 0                                |

Supplementary Table 1. Human scoring of social status. Socio-matrix indicating the number of winning and losing behaviors that were observed during agonistic interactions between each pair of monkeys (including the two viewer monkeys MF and MR). During food tests, the individual who grabbed the food was considered the winner (see Methods). Data along columns represent the lost social interactions for a given monkey against each of the other monkeys, while data along the rows represent the wins for a given monkey.

|                                    |                        | AMYGDALA   | OFC        | ACC        |
|------------------------------------|------------------------|------------|------------|------------|
| <b><u>1<sup>st</sup> EPOCH</u></b> | <b>SOCIAL</b>          | 55 (30.6%) | 20 (16.7%) | 10 (6.3%)  |
|                                    | SOCIAL - DOMINANT      | 35         | 12         | 5          |
|                                    | SOCIAL - SUBMISSIVE    | 20         | 8          | 5          |
|                                    | <b>FRACTAL</b>         | 70 (38.9%) | 31 (25.8%) | 62 (39.2%) |
|                                    | FRACTAL - LARGE REWARD | 39         | 14         | 41         |
|                                    | FRACTAL - NO REWARD    | 31         | 17         | 21         |
| <b>TOTAL</b>                       |                        | 180        | 120        | 158        |
| <b><u>2<sup>nd</sup> EPOCH</u></b> | <b>SOCIAL</b>          | 33 (18.3%) | 14 (11.7%) | 15 (9.5%)  |
|                                    | SOCIAL - DOMINANT      | 12         | 8          | 8          |
|                                    | SOCIAL - SUBMISSIVE    | 21         | 6          | 7          |
|                                    | <b>FRACTAL</b>         | 61 (33.9%) | 27 (22.5%) | 75 (47.5%) |
|                                    | FRACTAL - LARGE REWARD | 33         | 15         | 52         |
|                                    | FRACTAL - NO REWARD    | 28         | 12         | 23         |

Supplementary Table 2. Number and percentage of neurons with a significant regression factor ( $p < 0.05$ ) for social and fractal images in two time epochs. The First epoch was 100 to 400 ms after image onset (fixation), and the second epoch was 400 to 700ms after image onset (free viewing).
